# Supplementary material for: Improvements in Children’s Oncology Group neuroblastoma risk stratification through a change in age cut-off and use of INRGSS
Source: PubMed Central journal article supplement — Transl Pediatr. 2024 Oct 28;13(10):1899–901. doi: 10.21037/tp-24-319 (PMC11543114; doi:10.21037/tp-24-319), 2024-10-28
Supplement: tp-13-10-1899-coif.pdf [file tp-13-10-1899-coif.pdf]

## ICMJE DISCLOSURE FORM

**Date:** 9/23/2024

**Your Name:** Wendy B London

**Manuscript Title:** Improvements in COG neuroblastoma risk stratification through a change in age cut-off and use of INRGSS

**Manuscript number (if known):** TP-24-319

In the interest of transparency, we ask you to disclose all relationships/activities/interests listed below that are related to the content of your manuscript. “Related” means any relation with for-profit or not-for-profit third parties whose interests may be affected by the content of the manuscript. Disclosure represents a commitment to transparency and does not necessarily indicate a bias. If you are in doubt about whether to list a relationship/activity/interest, it is preferable that you do so.

The following questions apply to the author’s relationships/activities/interests as they relate to the current manuscript only.

The author’s relationships/activities/interests should be defined broadly. For example, if your manuscript pertains to the epidemiology of hypertension, you should declare all relationships with manufacturers of antihypertensive medication, even if that medication is not mentioned in the manuscript.

In item #1 below, report all support for the work reported in this manuscript without time limit. For all other items, the time frame for disclosure is the past 36 months.

|                                                           |                                                                                                                                                                                | Name all entities with whom you have this relationship or indicate none (add rows as needed) | Specifications/Comments (e.g., if payments were made to you or to your institution) |
|-----------------------------------------------------------|--------------------------------------------------------------------------------------------------------------------------------------------------------------------------------|----------------------------------------------------------------------------------------------|-------------------------------------------------------------------------------------|
| <b>Time frame: Since the initial planning of the work</b> |                                                                                                                                                                                |                                                                                              |                                                                                     |
| 1                                                         | All support for the present manuscript (e.g., funding, provision of study materials, medical writing, article processing charges, etc.)<br><b>No time limit for this item.</b> |                                                                                              |                                                                                     |
|                                                           |                                                                                                                                                                                | Children’s Oncology Group                                                                    | Payments made to my institution.                                                    |
|                                                           |                                                                                                                                                                                | NIH/NCI                                                                                      | COG funding from U10 CA180886 COG NIH/NCI.                                          |
|                                                           |                                                                                                                                                                                | Alex’s Lemonade Stand                                                                        |                                                                                     |
|                                                           |                                                                                                                                                                                | Little Heroes Pediatric Cancer Research                                                      |                                                                                     |
|                                                           |                                                                                                                                                                                |                                                                                              |                                                                                     |
| <b>Time frame: past 36 months</b>                         |                                                                                                                                                                                |                                                                                              |                                                                                     |
| 2                                                         | Grants or contracts from any entity (if not indicated in item #1 above).                                                                                                       | <u>    </u> None                                                                             |                                                                                     |
|                                                           |                                                                                                                                                                                | See #1 above                                                                                 |                                                                                     |
|                                                           |                                                                                                                                                                                |                                                                                              |                                                                                     |
| 3                                                         | Royalties or licenses                                                                                                                                                          | <u>  X  </u> None                                                                            |                                                                                     |
|                                                           |                                                                                                                                                                                |                                                                                              |                                                                                     |
|                                                           |                                                                                                                                                                                |                                                                                              |                                                                                     |
| 4                                                         | Consulting fees                                                                                                                                                                | <u>  X  </u> None                                                                            |                                                                                     |

|    |                                                                                                              |                                                                   |             |
|----|--------------------------------------------------------------------------------------------------------------|-------------------------------------------------------------------|-------------|
|    |                                                                                                              |                                                                   |             |
| 5  | Payment or honoraria for lectures, presentations, speakers bureaus, manuscript writing or educational events | <input checked="" type="checkbox"/> None                          |             |
| 6  | Payment for expert testimony                                                                                 | <input checked="" type="checkbox"/> None                          |             |
| 7  | Support for attending meetings and/or travel                                                                 | <input type="checkbox"/> <input checked="" type="checkbox"/> None |             |
| 8  | Patents planned, issued or pending                                                                           | <input checked="" type="checkbox"/> None                          |             |
| 9  | Participation on a Data Safety Monitoring Board or Advisory Board                                            | Jubilant DraxImage                                                | DSMB member |
| 10 | Leadership or fiduciary role in other board, society, committee or advocacy group, paid or unpaid            | <input type="checkbox"/> <input checked="" type="checkbox"/> None |             |
| 11 | Stock or stock options                                                                                       | <input type="checkbox"/> <input checked="" type="checkbox"/> None |             |
| 12 | Receipt of equipment, materials, drugs, medical writing, gifts or other services                             | <input checked="" type="checkbox"/> None                          |             |
| 13 | Other financial or non-financial interests                                                                   | <input checked="" type="checkbox"/> None                          |             |

**Please summarize the above conflict of interest in the following box:**

WBL reports funding from COG NIH/NCI grant U10 CA180886, Children's Oncology Group (payments made to her institution), Alex's Lemonade Stand, and Little Heroes Pediatric Cancer Research and she serves on the Data Safety Monitoring Board of Jubilant DraxImage.

**Please place an "X" next to the following statement to indicate your agreement:**

I certify that I have answered every question and have not altered the wording of any of the questions on this form.

## ICMJE DISCLOSURE FORM

**Date:** September 23, 2024

**Your Name:** Hannah Bousquet

**Manuscript Title:** Improvements in COG neuroblastoma risk stratification through a change in age cut-off and use of INRGSS

**Manuscript number (if known):** TP-24-319

In the interest of transparency, we ask you to disclose all relationships/activities/interests listed below that are related to the content of your manuscript. “Related” means any relation with for-profit or not-for-profit third parties whose interests may be affected by the content of the manuscript. Disclosure represents a commitment to transparency and does not necessarily indicate a bias. If you are in doubt about whether to list a relationship/activity/interest, it is preferable that you do so.

The following questions apply to the author’s relationships/activities/interests as they relate to the current manuscript only.

The author’s relationships/activities/interests should be defined broadly. For example, if your manuscript pertains to the epidemiology of hypertension, you should declare all relationships with manufacturers of antihypertensive medication, even if that medication is not mentioned in the manuscript.

In item #1 below, report all support for the work reported in this manuscript without time limit. For all other items, the time frame for disclosure is the past 36 months.

|                                                           |                                                                                                                                                                                | Name all entities with whom you have this relationship or indicate none (add rows as needed) | Specifications/Comments (e.g., if payments were made to you or to your institution) |
|-----------------------------------------------------------|--------------------------------------------------------------------------------------------------------------------------------------------------------------------------------|----------------------------------------------------------------------------------------------|-------------------------------------------------------------------------------------|
| <b>Time frame: Since the initial planning of the work</b> |                                                                                                                                                                                |                                                                                              |                                                                                     |
| 1                                                         | All support for the present manuscript (e.g., funding, provision of study materials, medical writing, article processing charges, etc.)<br><b>No time limit for this item.</b> | <u>  X  </u> None                                                                            |                                                                                     |
|                                                           |                                                                                                                                                                                |                                                                                              |                                                                                     |
|                                                           |                                                                                                                                                                                |                                                                                              |                                                                                     |
|                                                           |                                                                                                                                                                                |                                                                                              |                                                                                     |
|                                                           |                                                                                                                                                                                |                                                                                              |                                                                                     |
| <b>Time frame: past 36 months</b>                         |                                                                                                                                                                                |                                                                                              |                                                                                     |
| 2                                                         | Grants or contracts from any entity (if not indicated in item #1 above).                                                                                                       | <u>  X  </u> None                                                                            |                                                                                     |
|                                                           |                                                                                                                                                                                |                                                                                              |                                                                                     |
| 3                                                         | Royalties or licenses                                                                                                                                                          | <u>  X  </u> None                                                                            |                                                                                     |
|                                                           |                                                                                                                                                                                |                                                                                              |                                                                                     |
| 4                                                         | Consulting fees                                                                                                                                                                | <u>  X  </u> None                                                                            |                                                                                     |
|                                                           |                                                                                                                                                                                |                                                                                              |                                                                                     |

|    |                                                                                                              |                                          |  |
|----|--------------------------------------------------------------------------------------------------------------|------------------------------------------|--|
|    |                                                                                                              |                                          |  |
| 5  | Payment or honoraria for lectures, presentations, speakers bureaus, manuscript writing or educational events | <input checked="" type="checkbox"/> None |  |
| 6  | Payment for expert testimony                                                                                 | <input checked="" type="checkbox"/> None |  |
| 7  | Support for attending meetings and/or travel                                                                 | <input checked="" type="checkbox"/> None |  |
| 8  | Patents planned, issued or pending                                                                           | <input checked="" type="checkbox"/> None |  |
| 9  | Participation on a Data Safety Monitoring Board or Advisory Board                                            | <input checked="" type="checkbox"/> None |  |
| 10 | Leadership or fiduciary role in other board, society, committee or advocacy group, paid or unpaid            | <input checked="" type="checkbox"/> None |  |
| 11 | Stock or stock options                                                                                       | <input checked="" type="checkbox"/> None |  |
| 12 | Receipt of equipment, materials, drugs, medical writing, gifts or other services                             | <input checked="" type="checkbox"/> None |  |
| 13 | Other financial or non-financial interests                                                                   | <input checked="" type="checkbox"/> None |  |

**Please summarize the above conflict of interest in the following box:**

|                                      |
|--------------------------------------|
| No conflicts of interest to declare. |
|--------------------------------------|

**Please place an "X" next to the following statement to indicate your agreement:**

I certify that I have answered every question and have not altered the wording of any of the questions on this form.

## ICMJE DISCLOSURE FORM

**Date:** Sept 23, 2024

**Your Name:** Meredith S. Irwin

**Manuscript Title:** Improvements in COG neuroblastoma risk stratification through a change in age cut-off and use of INRGSS

**Manuscript number (if known):** TP-24-319

In the interest of transparency, we ask you to disclose all relationships/activities/interests listed below that are related to the content of your manuscript. “Related” means any relation with for-profit or not-for-profit third parties whose interests may be affected by the content of the manuscript. Disclosure represents a commitment to transparency and does not necessarily indicate a bias. If you are in doubt about whether to list a relationship/activity/interest, it is preferable that you do so.

The following questions apply to the author’s relationships/activities/interests as they relate to the current manuscript only.

The author’s relationships/activities/interests should be defined broadly. For example, if your manuscript pertains to the epidemiology of hypertension, you should declare all relationships with manufacturers of antihypertensive medication, even if that medication is not mentioned in the manuscript.

In item #1 below, report all support for the work reported in this manuscript without time limit. For all other items, the time frame for disclosure is the past 36 months.

|                                                           |                                                                                                                                                                                | Name all entities with whom you have this relationship or indicate none (add rows as needed) | Specifications/Comments (e.g., if payments were made to you or to your institution)                                                                                                                                                                                         |
|-----------------------------------------------------------|--------------------------------------------------------------------------------------------------------------------------------------------------------------------------------|----------------------------------------------------------------------------------------------|-----------------------------------------------------------------------------------------------------------------------------------------------------------------------------------------------------------------------------------------------------------------------------|
| <b>Time frame: Since the initial planning of the work</b> |                                                                                                                                                                                |                                                                                              |                                                                                                                                                                                                                                                                             |
| 1                                                         | All support for the present manuscript (e.g., funding, provision of study materials, medical writing, article processing charges, etc.)<br><b>No time limit for this item.</b> | <input checked="" type="checkbox"/> None                                                     |                                                                                                                                                                                                                                                                             |
|                                                           |                                                                                                                                                                                |                                                                                              |                                                                                                                                                                                                                                                                             |
|                                                           |                                                                                                                                                                                |                                                                                              |                                                                                                                                                                                                                                                                             |
|                                                           |                                                                                                                                                                                |                                                                                              |                                                                                                                                                                                                                                                                             |
|                                                           |                                                                                                                                                                                |                                                                                              |                                                                                                                                                                                                                                                                             |
|                                                           |                                                                                                                                                                                |                                                                                              |                                                                                                                                                                                                                                                                             |
| <b>Time frame: past 36 months</b>                         |                                                                                                                                                                                |                                                                                              |                                                                                                                                                                                                                                                                             |
| 2                                                         | Grants or contracts from any entity (if not indicated in item #1 above).                                                                                                       |                                                                                              | Canadian Inst of Health Research lab operating grant – Targeting Metastatic Neuroblastoma (not directly related to this manuscript)<br>NIH National Clinical Trials Network (NCTN) Grant (U10CA180886). COG Neuroblastoma Disease Committee leadership role salary support. |
|                                                           |                                                                                                                                                                                |                                                                                              |                                                                                                                                                                                                                                                                             |
|                                                           |                                                                                                                                                                                |                                                                                              |                                                                                                                                                                                                                                                                             |

|    |                                                                                                              |                                          |                                                                              |
|----|--------------------------------------------------------------------------------------------------------------|------------------------------------------|------------------------------------------------------------------------------|
| 3  | Royalties or licenses                                                                                        | <input checked="" type="checkbox"/> None |                                                                              |
|    |                                                                                                              |                                          |                                                                              |
|    |                                                                                                              |                                          |                                                                              |
| 4  | Consulting fees                                                                                              | <input checked="" type="checkbox"/> None |                                                                              |
|    |                                                                                                              |                                          |                                                                              |
|    |                                                                                                              |                                          |                                                                              |
| 5  | Payment or honoraria for lectures, presentations, speakers bureaus, manuscript writing or educational events | <input checked="" type="checkbox"/> None |                                                                              |
|    |                                                                                                              |                                          |                                                                              |
|    |                                                                                                              |                                          |                                                                              |
| 6  | Payment for expert testimony                                                                                 | <input checked="" type="checkbox"/> None |                                                                              |
|    |                                                                                                              |                                          |                                                                              |
|    |                                                                                                              |                                          |                                                                              |
| 7  | Support for attending meetings and/or travel                                                                 |                                          | Children's Oncology Group (COG) meeting travel support                       |
|    |                                                                                                              |                                          |                                                                              |
|    |                                                                                                              |                                          |                                                                              |
| 8  | Patents planned, issued or pending                                                                           | <input checked="" type="checkbox"/> None |                                                                              |
|    |                                                                                                              |                                          |                                                                              |
|    |                                                                                                              |                                          |                                                                              |
| 9  | Participation on a Data Safety Monitoring Board or Advisory Board                                            | <input checked="" type="checkbox"/> None |                                                                              |
|    |                                                                                                              |                                          |                                                                              |
|    |                                                                                                              |                                          |                                                                              |
| 10 | Leadership or fiduciary role in other board, society, committee or advocacy group, paid or unpaid            |                                          | Solving Kids Cancer and UK Neuroblastoma Scientific Advisory Boards (unpaid) |
|    |                                                                                                              |                                          |                                                                              |
|    |                                                                                                              |                                          |                                                                              |
| 11 | Stock or stock options                                                                                       | <input checked="" type="checkbox"/> None |                                                                              |
|    |                                                                                                              |                                          |                                                                              |
|    |                                                                                                              |                                          |                                                                              |
| 12 | Receipt of equipment, materials, drugs, medical writing, gifts or other services                             | <input checked="" type="checkbox"/> None |                                                                              |
|    |                                                                                                              |                                          |                                                                              |
|    |                                                                                                              |                                          |                                                                              |
| 13 | Other financial or non-financial interests                                                                   | <input checked="" type="checkbox"/> None |                                                                              |
|    |                                                                                                              |                                          |                                                                              |
|    |                                                                                                              |                                          |                                                                              |

**Please summarize the above conflict of interest in the following box:**

MSI reports funding from COG NIH/NCI grant U10 CA180886 and the Canadian Inst of Health Research lab operating grant, Children's Oncology Group (COG) meeting travel support, and serves as Chair for Neuroblastoma Biology (Children Oncology Group).

**Please place an "X" next to the following statement to indicate your agreement:**

**X** I certify that I have answered every question and have not altered the wording of any of the questions on this form.

## ICMJE DISCLOSURE FORM

**Date:** September 20, 2024

**Your Name:** Michael D. Hogarty

**Manuscript Title:** Improvements in COG neuroblastoma risk stratification through a change in age cut-off and use of INRGSS

**Manuscript number (if known):** TP-24-319

In the interest of transparency, we ask you to disclose all relationships/activities/interests listed below that are related to the content of your manuscript. “Related” means any relation with for-profit or not-for-profit third parties whose interests may be affected by the content of the manuscript. Disclosure represents a commitment to transparency and does not necessarily indicate a bias. If you are in doubt about whether to list a relationship/activity/interest, it is preferable that you do so.

The following questions apply to the author’s relationships/activities/interests as they relate to the current manuscript only.

The author’s relationships/activities/interests should be defined broadly. For example, if your manuscript pertains to the epidemiology of hypertension, you should declare all relationships with manufacturers of antihypertensive medication, even if that medication is not mentioned in the manuscript.

In item #1 below, report all support for the work reported in this manuscript without time limit. For all other items, the time frame for disclosure is the past 36 months.

|                                                           |                                                                                                                                                                                | Name all entities with whom you have this relationship or indicate none (add rows as needed) | Specifications/Comments (e.g., if payments were made to you or to your institution) |
|-----------------------------------------------------------|--------------------------------------------------------------------------------------------------------------------------------------------------------------------------------|----------------------------------------------------------------------------------------------|-------------------------------------------------------------------------------------|
| <b>Time frame: Since the initial planning of the work</b> |                                                                                                                                                                                |                                                                                              |                                                                                     |
| 1                                                         | All support for the present manuscript (e.g., funding, provision of study materials, medical writing, article processing charges, etc.)<br><b>No time limit for this item.</b> | <u>  X  </u> None                                                                            |                                                                                     |
|                                                           |                                                                                                                                                                                |                                                                                              |                                                                                     |
|                                                           |                                                                                                                                                                                |                                                                                              |                                                                                     |
|                                                           |                                                                                                                                                                                |                                                                                              |                                                                                     |
|                                                           |                                                                                                                                                                                |                                                                                              |                                                                                     |
|                                                           |                                                                                                                                                                                |                                                                                              |                                                                                     |
| <b>Time frame: past 36 months</b>                         |                                                                                                                                                                                |                                                                                              |                                                                                     |
| 2                                                         | Grants or contracts from any entity (if not indicated in item #1 above).                                                                                                       |                                                                                              | U10 CA180886 COG NIH/NCI (per case reimbursements to institution)                   |
|                                                           |                                                                                                                                                                                |                                                                                              |                                                                                     |
| 3                                                         | Royalties or licenses                                                                                                                                                          | <u>  X  </u> None                                                                            |                                                                                     |
|                                                           |                                                                                                                                                                                |                                                                                              |                                                                                     |
| 4                                                         | Consulting fees                                                                                                                                                                | <u>  X  </u> None                                                                            |                                                                                     |

|    |                                                                                                              |                                          |                                                                               |
|----|--------------------------------------------------------------------------------------------------------------|------------------------------------------|-------------------------------------------------------------------------------|
|    |                                                                                                              |                                          |                                                                               |
| 5  | Payment or honoraria for lectures, presentations, speakers bureaus, manuscript writing or educational events | <input checked="" type="checkbox"/> None |                                                                               |
| 6  | Payment for expert testimony                                                                                 | <input checked="" type="checkbox"/> None |                                                                               |
| 7  | Support for attending meetings and/or travel                                                                 |                                          | U10 CA180886 COG NIH/NCI<br>Travel as Institutional PI to attend COG meetings |
| 8  | Patents planned, issued or pending                                                                           | <input checked="" type="checkbox"/> None |                                                                               |
| 9  | Participation on a Data Safety Monitoring Board or Advisory Board                                            | <input checked="" type="checkbox"/> None |                                                                               |
| 10 | Leadership or fiduciary role in other board, society, committee or advocacy group, paid or unpaid            | <input checked="" type="checkbox"/> None |                                                                               |
| 11 | Stock or stock options                                                                                       | <input checked="" type="checkbox"/> None |                                                                               |
| 12 | Receipt of equipment, materials, drugs, medical writing, gifts or other services                             | <input checked="" type="checkbox"/> None |                                                                               |
| 13 | Other financial or non-financial interests                                                                   | <input checked="" type="checkbox"/> None |                                                                               |

**Please summarize the above conflict of interest in the following box:**

MDH reports funding from COG NIH/NCI grant U10 CA180886.

**Please place an "X" next to the following statement to indicate your agreement:**

I certify that I have answered every question and have not altered the wording of any of the questions on this form.



## ICMJE DISCLOSURE FORM

**Date:** September 20, 2024

**Your Name:** Susan L. Cohn

**Manuscript Title:** Improvements in COG neuroblastoma risk stratification through a change in age cut-off and use of INRGSS

**Manuscript number (if known):** TP-24-319

In the interest of transparency, we ask you to disclose all relationships/activities/interests listed below that are related to the content of your manuscript. "Related" means any relation with for-profit or not-for-profit third parties whose interests may be affected by the content of the manuscript. Disclosure represents a commitment to transparency and does not necessarily indicate a bias. If you are in doubt about whether to list a relationship/activity/interest, it is preferable that you do so.

The following questions apply to the author's relationships/activities/interests as they relate to the current manuscript only.

The author's relationships/activities/interests should be defined broadly. For example, if your manuscript pertains to the epidemiology of hypertension, you should declare all relationships with manufacturers of antihypertensive medication, even if that medication is not mentioned in the manuscript.

In item #1 below, report all support for the work reported in this manuscript without time limit. For all other items, the time frame for disclosure is the past 36 months.

|                                                           |                                                                                                                                                                                | Name all entities with whom you have this relationship or indicate none (add rows as needed) | Specifications/Comments (e.g., if payments were made to you or to your institution) |
|-----------------------------------------------------------|--------------------------------------------------------------------------------------------------------------------------------------------------------------------------------|----------------------------------------------------------------------------------------------|-------------------------------------------------------------------------------------|
| <b>Time frame: Since the initial planning of the work</b> |                                                                                                                                                                                |                                                                                              |                                                                                     |
| 1                                                         | All support for the present manuscript (e.g., funding, provision of study materials, medical writing, article processing charges, etc.)<br><b>No time limit for this item.</b> | <u>  X  </u> None                                                                            |                                                                                     |
|                                                           |                                                                                                                                                                                |                                                                                              |                                                                                     |
|                                                           |                                                                                                                                                                                |                                                                                              |                                                                                     |
|                                                           |                                                                                                                                                                                |                                                                                              |                                                                                     |
|                                                           |                                                                                                                                                                                |                                                                                              |                                                                                     |
|                                                           |                                                                                                                                                                                |                                                                                              |                                                                                     |
| <b>Time frame: past 36 months</b>                         |                                                                                                                                                                                |                                                                                              |                                                                                     |
| 2                                                         | Grants or contracts from any entity (if not indicated in item #1 above).                                                                                                       | <u>    </u> None                                                                             | U10 CA180886 COG NIH/NCI (per case reimbursements to institution)                   |
|                                                           |                                                                                                                                                                                |                                                                                              |                                                                                     |
| 3                                                         | Royalties or licenses                                                                                                                                                          | <u>  X  </u> None                                                                            |                                                                                     |
|                                                           |                                                                                                                                                                                |                                                                                              |                                                                                     |
| 4                                                         | Consulting fees                                                                                                                                                                | <u>  X  </u> None                                                                            |                                                                                     |

|    |                                                                                                              |                                          |                                                                               |
|----|--------------------------------------------------------------------------------------------------------------|------------------------------------------|-------------------------------------------------------------------------------|
|    |                                                                                                              |                                          |                                                                               |
| 5  | Payment or honoraria for lectures, presentations, speakers bureaus, manuscript writing or educational events | <input checked="" type="checkbox"/> None |                                                                               |
| 6  | Payment for expert testimony                                                                                 | <input checked="" type="checkbox"/> None |                                                                               |
| 7  | Support for attending meetings and/or travel                                                                 | <input type="checkbox"/> None            | U10 CA180886 COG NIH/NCI<br>Travel as Institutional PI to attend COG meetings |
| 8  | Patents planned, issued or pending                                                                           | <input checked="" type="checkbox"/> None |                                                                               |
| 9  | Participation on a Data Safety Monitoring Board or Advisory Board                                            | <input checked="" type="checkbox"/> None |                                                                               |
| 10 | Leadership or fiduciary role in other board, society, committee or advocacy group, paid or unpaid            | <input checked="" type="checkbox"/> None |                                                                               |
| 11 | Stock or stock options                                                                                       | <input checked="" type="checkbox"/> None |                                                                               |
| 12 | Receipt of equipment, materials, drugs, medical writing, gifts or other services                             | <input checked="" type="checkbox"/> None |                                                                               |
| 13 | Other financial or non-financial interests                                                                   | <input checked="" type="checkbox"/> None |                                                                               |

**Please summarize the above conflict of interest in the following box:**

SLC reports funding from COG NIH/NCI grant U10 CA180886.

**Please place an "X" next to the following statement to indicate your agreement:**

I certify that I have answered every question and have not altered the wording of any of the questions on this form.
